# Supplementary material for: Genetic variability and trait associations for physiological and agronomic characteristics in bread wheat genotypes under drought stress and well-watered conditions
Source: PeerJ. 2025 May 16;13:e19341. doi: 10.7717/peerj.19341 (PMC12087580; doi:10.7717/peerj.19341)
Supplement: Supplemental Information 2 [file peerj-13-19341-s002.xlsx]

## Sheet: Sheet1
Season	Environment	Genotypes	Replcations	Chl a	Chl b	NPR	Tr	gs	RWC	MSI	MDA	ProC	CAT	APX	SOD	PH	NGPS	TKW	GY
S1	Normal	G1	1	3.89	1.9	24.3	4	0.8	85	63	32	0.74	10	10	29	105	65	47	7.7
S1	Normal	G2	1	3.5	1.67	17	5.5	0.58	74.3	54.42	38.4	0.73	8.92	8.92	36	89	55	40.3	6.86
S1	Normal	G3	1	3.8	2.93	25	3.9	0.85	83.2	53.67	21	0.77	7.6	7.6	36	105	67.4	45	9.59
S1	Normal	G4	1	3.87	2.86	21.6	3.7	0.57	76.6	53.93	39.8	0.66	9.2	9.2	25	106	73	55.2	8.2
S1	Normal	G5	1	3.85	1.73	18	4.46	0.63	85.5	50	44	0.7	9.6	9.6	28	92	57.2	50	6.37
S1	Normal	G6	1	3.8	1.84	18.5	4.45	0.65	82.4	46	43.7	0.7	11.6	11.6	26.4	98.8	63.8	48	7.75
S1	Normal	G7	1	3.84	2.11	17.5	4.46	0.65	72.6	56.48	41.1	0.77	10.4	10.4	34	94	55.6	5.5	7.1
S1	Normal	G8	1	3.85	2.13	21.62	3.7	0.89	76.6	46	27	0.72	10	10	35.8	109	71	50	6.76
S1	Normal	G9	1	3.97	2.85	24.5	3.9	0.66	78.4	57.05	38.4	0.73	8.8	8.8	32	88	56	49	8.46
S1	Normal	G10	1	3.84	2.24	20.6	4.2	0.7	83.6	53.93	27	0.65	9.2	9.2	36	80	70.8	47	4.85
S1	Normal	G11	1	3.75	2.93	17	5.3	0.86	83.4	50	31	0.73	10	10	33.2	80	77	42.5	7.36
S1	Normal	G12	1	3.88	2.95	16.5	3.9	0.83	82	51.16	33	0.73	9.2	9.2	33.2	92	62.2	50	6.1
S1	Normal	G13	1	3.85	1.54	17	5.2	0.61	83	52	28	0.7	10.4	10.4	24	80	48	46.3	7.72
S1	Normal	G14	1	3.87	1.32	20.62	5.5	0.52	81	50	38.4	0.7	9.4	9.4	36	80	60	40	6
S1	Normal	G1	2	3.38	1.6	22.5	3	0.77	80.2	62	29	0.72	8.43	8.43	38	107	61	49.5	8.71
S1	Normal	G2	2	3.86	1.42	16	5.7	0.56	76.2	49	36.7	0.74	8.17	8.17	41	92	60	47	6.6
S1	Normal	G3	2	3	2.56	23	3.9	0.9	86	51.64	18	0.77	7.26	7.26	29	110	69	47	8.79
S1	Normal	G4	2	3.43	2.5	20.74	3.55	0.55	79	51.89	36	0.69	10.1	10.1	30	110	76.68	50	7.77
S1	Normal	G5	2	3.4	1.45	17.27	4.28	0.6	88	48.12	42	0.72	10.52	10.52	30.5	93	55	49.3	7.06
S1	Normal	G6	2	3.22	1.6	16.5	4.27	0.68	85	49.23	41.79	0.71	12	12	30.9	100	65	53	7.77
S1	Normal	G7	2	3.34	1.82	17.27	4.28	0.63	75	54.34	39.3	0.78	11.38	11.38	35	96.2	56	49	6.9
S1	Normal	G8	2	3.49	1.85	20.76	3.55	0.86	80	59.26	35.46	0.73	10.95	10.95	33	107	73	54	9.97
S1	Normal	G9	2	3.34	2.49	23.52	3.5	0.5	80	54.89	36.7	0.73	9.42	9.42	28	92	57	50	6.7
S1	Normal	G10	2	3.39	1.9	19.78	4.03	0.67	84	51.89	25.76	0.68	9.84	9.84	35.2	85.6	65.47	48	7.45
S1	Normal	G11	2	3.47	2.56	16.31	3.14	0.82	85	48.12	29.6	0.75	10.68	10.68	29.6	82	65.73	46.7	7.1
S1	Normal	G12	2	3.17	2.58	16.34	3.74	0.8	84	49.23	31.52	0.73	9.84	9.84	35	85	66	46	6.6
S1	Normal	G13	2	3.64	1.3	16.31	4.8	0.58	87	50	26.72	0.73	9.98	9.98	32	90	52	48.7	5.1
S1	Normal	G14	2	3.35	1.2	19.8	5.2	0.5	77	48	36.7	0.7	8.62	8.62	42	85	56	47	5.95
S1	Normal	G1	3	3.64	1.69	26.44	2.5	0.84	79.5	58	34	0.78	10.8	10.8	40	95	57	53	7.37
S1	Normal	G2	3	3.7	1.47	18	4.8	0.6	73.8	60	40.1	0.75	9.67	9.67	36	84	60	44.2	6.1
S1	Normal	G3	3	4	2.58	25.52	3.9	0.8	80	55.7	20.96	0.75	8.5	8.5	32	108	72.94	45.3	7.08
S1	Normal	G4	3	3.65	2.4	22.46	3.85	0.59	75	55.97	43	0.65	8.82	8.82	26	102	72.26	60	9.26
S1	Normal	G5	3	3.7	1.55	18.7	4.64	0.66	83	51.88	46	0.68	9.2	9.2	32	97	51	52	6.6
S1	Normal	G6	3	3.51	1.62	18.74	4.62	0.68	82	59	45.61	0.73	11.6	11.6	28.7	102	65	50.2	6.22
S1	Normal	G7	3	3.59	1.9	18.25	4.64	0.68	72	58.62	42.9	0.83	9.98	9.98	33	104	58	52	7.1
S1	Normal	G8	3	3.67	1.88	22.48	3.85	0.93	75	63.94	48	0.7	9.59	9.59	37.2	106	69.88	52	6.67
S1	Normal	G9	3	3.65	2.51	25.48	4.5	0.5	75.5	59.21	40.1	0.75	8.3	8.3	29	96	59	46	5.73
S1	Normal	G10	3	3.68	2	21.42	4.37	0.73	82	55.97	28.24	0.7	8.69	8.69	37	100	71.4	52.5	6.96
S1	Normal	G11	3	3.66	2.58	17.67	4.47	0.89	79	51.88	32.4	0.78	9.46	9.46	31.2	85	74	46	7.6
S1	Normal	G12	3	3.52	2.6	18.2	4.06	0.86	80	53.09	34.48	0.7	8.69	8.69	34.5	100	60	52	6.1
S1	Normal	G13	3	3.45	1.4	17.67	4.5	0.63	83.8	63	29.28	0.7	11.52	11.52	30	75.3	50	45	5.96
S1	Normal	G14	3	3.61	1.45	21.44	5.8	0.54	78.4	56	40.1	0.68	10.18	10.18	40	90	62	43	5.8
S1	Stress	G1	1	2.5	1.48	18.46	2.93	0.35	65	45.86	47	1.43	12.6	12.6	64.62	91.13	49	44.35	4.7
S1	Stress	G2	1	2.55	1.19	12.5	5.3	0.4	59	30	50	1	13	13	64.5	78.2	55	37.35	3.31
S1	Stress	G3	1	2.7	1.69	12.68	4.35	0.74	69	59.25	50.4	1.65	11.72	11.72	65	99.2	60.2	39.45	5.1
S1	Stress	G4	1	2.45	1.42	16.48	3.31	0.49	66.95	60	52	1.58	13.8	13.8	63.23	95.64	48	41.55	3.82
S1	Stress	G5	1	2.65	1.19	14.63	3.76	0.5	64.04	37.38	55.7	1.37	15.8	15.8	58.3	67	45	39.1	3.02
S1	Stress	G6	1	2.85	1.29	16.11	3.38	0.63	64.06	48	56	1.34	15.8	15.8	65	88.6	61.2	39.8	4.96
S1	Stress	G7	1	2.67	1.38	19.45	2.78	0.52	66.66	34.67	53.1	1.31	17	17	57.65	86.6	52	31.4	3.62
S1	Stress	G8	1	2.9	1.95	14.97	1.6	0.55	71.28	40	49.1	1.86	13.4	13.4	69	95.5	66	46.8	8.39
S1	Stress	G9	1	2.9	1.87	17.31	3.14	0.49	61.71	41.53	50.4	1.53	15	15	58	79.72	48	41.55	4
S1	Stress	G10	1	3	1.77	16.29	2.58	0.5	64.23	45.86	48	1.65	13.4	13.4	66	76.15	61.8	45.4	3.7
S1	Stress	G11	1	2.95	2.03	18.46	2.4	0.63	66.78	38	49	1.38	12.2	12.2	60.22	71.2	55	42	3.25
S1	Stress	G12	1	2.9	2.16	14.58	2.3	0.39	59.7	53	51.8	1.78	16	16	66.15	81.12	52	52.4	3.84
S1	Stress	G13	1	2.7	2.15	13.25	2.91	0.74	58.5	45	55.7	1.53	14.2	14.2	48	74	58	39.1	4.29
S1	Stress	G14	1	2.3	1.66	15.24	5.1	0.3	55.2	37.38	55.7	1.6	10.2	10.2	54	70.22	42	38.05	4.5
S1	Stress	G1	2	2.8	1.59	17.72	2.81	0.38	63.07	44.03	52	1.4	14.2	14.2	63	86.64	50.64	41.8	3.96
S1	Stress	G2	2	2.7	1.37	14	3	0.38	62.97	40	48.38	1.13	11	11	66	74.33	50	35.13	3.91
S1	Stress	G3	2	2.9	1.82	12.17	4.17	0.7	67.41	56.88	48.38	1.6	12.2	12.2	67	94.33	63.46	37.13	5.37
S1	Stress	G4	2	2.55	1.53	15.82	3.16	0.45	63.76	48.92	49.73	1.56	15	15	66.39	90.94	55	39.13	3.69
S1	Stress	G5	2	2.7	1.28	14	3.6	0.5	60.99	35.88	53.47	1.4	17.4	17.4	56.55	63.67	45	36.8	4.16
S1	Stress	G6	2	2.9	1.38	15.47	3.24	0.55	61.01	52	52	1.37	17.4	17.4	68	84.24	59.21	37.47	4.29
S1	Stress	G7	2	2.8	1.48	18.67	2.66	0.5	63.49	33.28	50.98	1.33	15.4	15.4	61.69	82.33	51.33	29.47	3.89
S1	Stress	G8	2	2.85	2.1	14.37	2	0.61	67.89	45	47.14	1.86	15.8	15.8	70	90.81	60	44.13	4.3
S1	Stress	G9	2	2.85	1.75	16.62	3	0.47	58.77	39.87	48.38	1.5	16	16	61	75.78	45	39.13	4.26
S1	Stress	G10	2	2.95	1.65	15.64	2.47	0.6	61.17	44.03	47	1.63	14.32	14.32	67.3	72.38	64.14	42.8	4.09
S1	Stress	G11	2	2.83	1.9	17.72	2.32	0.61	63.6	36	52	1.38	12.6	12.6	63.23	67.67	50	35.8	4.19
S1	Stress	G12	2	2.95	2.02	14	1.8	0.38	66.33	57	49.73	1.75	15	15	64.17	77.11	54.85	49.47	5.3
S1	Stress	G13	2	2.75	2	12.72	2.79	0.69	65	44	53.47	1.53	14.73	14.73	52	67.06	52	36.8	3.5
S1	Stress	G14	2	2.4	1.55	14.63	4.5	0.48	61.33	35.88	58	1.65	10.96	10.96	51	66.73	47	35.8	3.69
S1	Stress	G1	3	2.64	1.7	19.2	3.06	0.47	60	47.69	45.55	1.44	13.8	13.8	66	82.16	52	39.85	4.95
S1	Stress	G2	3	2.75	1.28	11.5	4.1	0.39	63	35	46	1.26	13	13	62	66.6	40	33.52	3.5
S1	Stress	G3	3	2.75	1.94	13.19	4.54	0.78	62	61.62	52.42	1.73	13	13	63	84.6	57.59	35.42	5.3
S1	Stress	G4	3	2.5	1.64	17.14	3.45	0.53	57.38	53	53.87	1.5	13.8	13.8	60.7	81.55	52	37.32	5.23
S1	Stress	G5	3	2.67	1.37	15.22	3.91	0.6	54.89	38.88	57.93	1.3	18.2	18.2	55	57	48	35.1	4.81
S1	Stress	G6	3	2.83	1.48	16.75	3.53	0.7	54.91	50	59	1.4	18.2	18.2	66	75.51	62	35.73	6.51
S1	Stress	G7	3	2.73	1.58	20.23	2.89	0.54	57.14	36.06	55.22	1.3	13.8	13.8	55.92	73.8	49	28.13	4.76
S1	Stress	G8	3	2.75	2.25	15.57	1.3	0.5	61.1	55	51.06	1.95	16.6	16.6	68.5	81.43	62	42.07	5.79
S1	Stress	G9	3	2.82	1.63	18	3.27	0.51	52.89	43.19	52.42	1.6	14.2	14.2	55.68	67.9	49	37.32	4.56
S1	Stress	G10	3	2.85	1.54	16.94	2.69	0.55	55.05	47.69	53	1.7	12.66	12.66	65.36	64.85	60.13	40.8	4.76
S1	Stress	G11	3	2.91	1.77	19.2	2.52	0.66	57.24	37	51	1.45	12.2	12.2	57.81	60.6	57.21	29	4.75
S1	Stress	G12	3	2.88	1.88	15.16	2.3	0.4	69.65	42	53.87	1.7	15.4	15.4	71.44	69.1	49.72	47.13	6.11
S1	Stress	G13	3	2.85	1.87	13.78	3.03	0.77	68.25	42	57.93	1.48	15	15	50	57	57.88	35.1	4.29
S1	Stress	G14	3	2.38	1.44	15.85	4.3	0.41	64.4	38.88	57.93	1.68	9.59	9.59	55	59.76	37	34.15	3.35
S2	Normal	G1	1	3.62	1.64	24.6	5.53	0.75	80.5	60.88	33.7	0.53	9.4	9.4	45.7	95.8	55	46.6	6.1
S2	Normal	G2	1	3.7	1.48	15.3	3.32	0.56	64.98	50.36	40.7	0.54	8.563	8.56	36.77	85.5	78	38.4	5.43
S2	Normal	G3	1	3.9	2.25	26	3.59	0.52	83.36	56.74	26.4	0.71	7.296	7.3	48.85	107	74	46.11	8.03
S2	Normal	G4	1	3.7	1.45	21	3.78	0.58	71.23	52.95	44.7	0.53	9.384	9.38	45.9	108.1	74.46	51.9	5.68
S2	Normal	G5	1	3.58	1.57	18.9	4.37	0.62	87.73	47.06	46.8	0.54	9.408	9.41	35.82	90.2	56.06	45.47	5.06
S2	Normal	G6	1	3.78	1.76	20.2	4.67	0.56	90.85	51.57	50.1	0.59	12.18	12.18	39.53	103.6	67	52.78	6.89
S2	Normal	G7	1	3.42	1.8	18.1	4.2	0.61	71.34	51	42.4	0.57	9.776	9.78	39.48	89.6	53.5	49.5	5.53
S2	Normal	G8	1	3.66	1.95	23.2	3.72	0.9	80.71	49	42	0.57	10.04	10.04	40	109.4	71.28	52.21	6.6
S2	Normal	G9	1	3.65	2.45	25.4	3.17	0.4	79.05	53.43	35	0.55	8.536	8.54	36.86	82.5	54.32	46.74	5.6
S2	Normal	G10	1	3.33	2.65	20.9	4	0.67	82.4	49.38	29.5	0.47	8.74	8.74	43.7	84	67.26	46.44	4.95
S2	Normal	G11	1	3.68	2.58	18.3	4.33	0.86	87.1	48.38	35.3	0.59	10.08	10.08	40.54	82.5	77.62	44.73	4.06
S2	Normal	G12	1	3.61	2.49	17.8	4.82	0.81	84.04	51	36.3	0.55	9.016	9.02	42.63	96.1	60.96	48.24	5.78
S2	Normal	G13	1	3.48	2.52	17.1	3.48	0.57	83.29	37	25	0.5	9.776	9.78	43.38	78.6	63.73	43.34	4.03
S2	Normal	G14	1	3.52	2	21.2	3.13	0.5	79.16	51	40.7	0.52	10.34	10.34	40.4	77.8	57.6	42	4.6
S2	Normal	G1	2	3.5	1.7	22	5.3	0.7	74.91	58.48	30	0.53	7.926	7.93	35.72	105	57.34	44.5	7.05
S2	Normal	G2	2	3.4	1.36	17.5	3	0.54	69.87	48.39	38	0.54	7.841	7.84	35.66	95.3	69	39	4.61
S2	Normal	G3	2	3.95	2.16	28.9	3.45	0.5	89.64	53	25.3	0.71	6.974	6.97	44	117	75.9	47	7.9
S2	Normal	G4	2	3.65	1.32	23.6	3.62	0.56	76.59	50.87	42.9	0.55	10.298	10.3	46.3	115.1	78.21	54	8.16
S2	Normal	G5	2	3.6	1.44	16.6	4.2	0.59	81.99	45.22	44.9	0.55	10.314	10.31	34.74	94.2	53.9	47	5.74
S2	Normal	G6	2	3.58	1.84	17.9	4.48	0.54	84.9	49.55	48.1	0.6	12.6	12.6	37.16	109.5	72.37	50	6.91
S2	Normal	G7	2	3.33	1.9	15.9	4	0.59	66.67	49.26	40.7	0.58	10.697	10.7	40.42	95.6	51	45	5.4
S2	Normal	G8	2	3.7	2.04	20.7	3.57	0.86	75.43	57.48	38	0.58	10.996	11	42	112.4	74	51	6.55
S2	Normal	G9	2	3.43	2.6	22.8	3.04	0.39	73.88	51.33	39.5	0.54	9.138	9.14	38.7	93.1	55.29	45	5.7
S2	Normal	G10	2	3.45	2.8	18.6	3.83	0.64	77.01	47.45	28.3	0.48	9.348	9.35	42.75	89	62.2	44.8	4.88
S2	Normal	G11	2	3.65	2.74	16.1	4.16	0.83	81.41	46.48	33.9	0.6	10.766	10.77	42.57	85.5	66.26	43.5	5.21
S2	Normal	G12	2	3.3	2.65	15.7	2.67	0.78	78.54	56	34.8	0.56	9.643	9.64	41.36	91.7	64.68	46.2	6.53
S2	Normal	G13	2	3.42	2.68	15	3.34	0.55	77.84	36	28.9	0.52	9.381	9.38	42.08	85.4	67.75	41	3.9
S2	Normal	G14	2	3.41	2.1	18.8	2.9	0.48	73.98	44	38	0.53	9.482	9.48	39.19	83.8	66.05	40	4.5
S2	Normal	G1	3	3.42	1.52	22.4	5.75	0.8	69.67	63.27	37	0.57	10.152	10.15	43.88	90	53.58	43.01	5.8
S2	Normal	G2	3	3.5	1.53	16.2	4	0.58	74.76	53	43	0.57	9.285	9.29	39.71	73.4	72	42.6	4.7
S2	Normal	G3	3	3.98	2.38	26.1	3.73	0.54	95.91	60	27.5	0.69	8.156	8.16	47.39	102	80.23	51	7.9
S2	Normal	G4	3	3.72	1.49	21.5	3.93	0.61	81.95	55.03	46.5	0.52	8.992	8.99	46.92	102.9	73.71	56.22	8.23
S2	Normal	G5	3	3.48	1.62	17.4	4.54	0.64	76.25	48.9	48.6	0.51	9.02	9.02	38.68	90.1	49.98	49.26	5.29
S2	Normal	G6	3	3.69	1.65	18.6	4.85	0.58	78.96	53.59	52.1	0.62	12.18	12.18	41.91	101.6	73.37	48.72	5.27
S2	Normal	G7	3	3.37	1.7	16.7	4.36	0.64	62.01	53.28	44.1	0.62	9.381	9.38	41.36	91.8	54.52	44.52	5.35
S2	Normal	G8	3	3.68	1.85	21.2	3.87	0.93	69	62.19	43.5	0.55	9.63	9.63	44	101.4	69	48.19	6.5
S2	Normal	G9	3	3.54	1.35	23.1	3.29	0.42	68.7	55.53	47	0.58	8.055	8.05	36.86	90.7	57.23	43.15	5.7
S2	Normal	G10	3	3.56	2.6	19.2	4.15	0.69	71.62	51.32	30.6	0.51	8.254	8.25	41.95	79	68	42.86	4.9
S2	Normal	G11	3	3.69	2.5	16.9	4.51	0.9	75.71	50.27	36.7	0.63	9.532	9.53	38.92	77.5	74.59	41.29	9.37
S2	Normal	G12	3	3.45	2.4	16.5	3.97	0.84	73.05	61	37.7	0.54	8.514	8.51	43.12	85	58.8	44.53	6.49
S2	Normal	G13	3	3.44	2.45	15.9	3.62	0.59	72.39	41	36	0.5	10.829	10.83	39.48	65.9	63.73	40.01	4.1
S2	Normal	G14	3	3.47	1.9	19.4	3.36	0.52	68.81	48	43	0.5	11.198	11.2	43.63	78.8	57.6	38.09	4.6
S2	Stress	G1	1	2.23	1.15	16.4	2.81	0.35	56	42	49	1.86	13.896	13.896	65	80	60	32.36	5.06
S2	Stress	G2	1	2.11	1.55	11	4.3	0.33	54	31	61.44	2.07	15	15	67.13	71	55	33.7	3.05
S2	Stress	G3	1	2.5	1.5	18.2	2.3	0.58	57	38	57.41	2.17	14.054	14.054	66	89	61.4	38	5.69
S2	Stress	G4	1	2.15	1.31	15.1	3.23	0.48	51	47.94	56.76	2.04	15.424	15.424	64.97	82	50	28	4.26
S2	Stress	G5	1	2.5	1.45	14.1	3.95	0.3	55	37.25	64.49	1.94	18.84	18.84	66	75	47.3	31.85	3.62
S2	Stress	G6	1	2.2	1.73	17	3.17	0.59	57	28.06	46	1.76	16.552	16.552	64.1	73	57.5	33	5.22
S2	Stress	G7	1	2.43	1.29	11.7	4.3	0.52	60	32.81	59.31	1.77	19.088	19.088	60.88	66	54	36.17	4.13
S2	Stress	G8	1	2.3	1.44	18	3.55	0.61	59	45	53.63	2.37	17.24	17.24	67.86	80	55.3	40.53	8.67
S2	Stress	G9	1	2.3	1.53	14.5	2.97	0.46	51.2	37.45	53.88	1.95	16	16	58	60	45.6	29.1	5.01
S2	Stress	G10	1	2.69	1.4	15	2.6	0.45	58.31	44.23	56.8	2.17	15.547	15.547	69.53	65.3	52	25	6.24
S2	Stress	G11	1	2.55	1.75	12.7	2.37	0.62	57	54.91	55.39	1.86	13.856	13.856	62.02	66	58.6	33	6.11
S2	Stress	G12	1	2.45	1.82	15.7	1.8	0.37	64	46	54.69	1.94	17.8	17.8	62.69	78	60	33	6.32
S2	Stress	G13	1	2.38	1.74	11.4	2.79	0.44	57.36	37	59.47	2.2	15.432	15.432	66.5	53.5	50	30.44	4.67
S2	Stress	G14	1	2.2	1.23	10.5	3.1	0.37	49	33.14	58.36	1.63	11.288	11.288	55.38	55	39.5	27.78	3.08
S2	Stress	G1	2	2.36	1.05	15.7	2.69	0.37	54	40.26	55	1.54	15.432	13.896	63	84	65	28	4.34
S2	Stress	G2	2	2.22	1.48	12.7	4.36	0.25	48	23	66	1.78	15	15	65.21	59	47	32.6	4.71
S2	Stress	G3	2	2.66	1.43	17.5	2.4	0.55	63	47	55.35	1.84	14.544	14.054	70	89	64.7	38	5.96
S2	Stress	G4	2	2.27	1.25	14	3.1	0.46	53	45.94	54.73	1.73	16.6	15.424	68.06	86.5	55	28	4.14
S2	Stress	G5	2	2.58	1.38	13.5	3.79	0.2	50	35.68	62.15	1.67	20.52	18.84	65	74.9	47.3	32.9	4.82
S2	Stress	G6	2	2.64	1.65	16.4	3.03	0.57	49	26.86	51	1.49	18.056	16.552	66.92	79	55.7	33	4.59
S2	Stress	G7	2	2.56	1.23	11	4	0.5	57	31.42	57.18	1.49	17.482	19.088	65	57	50	36.17	4.4
S2	Stress	G8	2	2.8	1.37	17.5	3.4	0.59	65	51	50	2.07	19.88	17.24	68.8	85	58.2	33.74	4.63
S2	Stress	G9	2	2.55	1.46	15	2.84	0.44	54	35.88	51.96	1.63	16.95	16	60.86	72	42.8	33.85	4.56
S2	Stress	G10	2	2.65	1.33	14.5	2.49	0.55	61	42.38	54.77	1.83	16.474	15.547	70.84	73	58	26	4.62
S2	Stress	G11	2	2.65	1.66	11.5	2.26	0.59	57	52.63	53.42	1.54	14.248	13.856	64.97	64	61.8	33.5	4.63
S2	Stress	G12	2	2.55	1.73	14.7	2.2	0.35	61	50	52.74	1.63	19	17.8	60.9	74	51.6	35	5.55
S2	Stress	G13	2	2.65	1.65	11	2.67	0.4	60	39	56	1.88	15.943	15.432	64.6	69.5	50	29.48	5.43
S2	Stress	G14	2	2.3	1.17	11.7	2.97	0.25	52.78	32	57	1.3	12.002	11.288	52	63	44.2	28.72	4.02
S2	Stress	G1	3	2.29	0.95	17.1	2.93	0.42	60	43.79	51	2.22	15.048	15.432	67	75.2	55	31	5.3
S2	Stress	G2	3	2.3	1.4	10.4	3.18	0.3	52	38	64	2.34	14.6	15	72.26	64	53	32.6	2.61
S2	Stress	G3	3	2.5	1.36	19	2.8	0.62	65	49	60	2.56	15.36	14.544	68.28	84	58.7	35	5.88
S2	Stress	G4	3	2.21	1.19	15.5	3.37	0.5	58	50	59	2.27	15.424	16.6	62.49	88	56	31	5.66
S2	Stress	G5	3	2.54	1.31	14.7	4.12	0.4	54	38.82	66.82	2.17	21.36	20.52	68	80	50.4	33.95	5.51
S2	Stress	G6	3	2.43	1.57	16.6	3.3	0.62	55	29.26	50	2.12	18.808	18.056	65.04	76.7	58.3	35	6.68
S2	Stress	G7	3	2.49	1.17	12.2	4.3	0.54	63	34.2	61.44	2.06	15.875	17.482	58	59	49.2	33.16	5.28
S2	Stress	G8	3	2.54	1.3	18.7	3.7	0.64	63	48	56	2.76	20.76	19.88	67.39	90	57.2	36.65	6.14
S2	Stress	G9	3	2.46	1.38	15.8	3.1	0.48	50	39.03	55.8	2.32	15.24	16.95	55.9	73	46.6	31	4.88
S2	Stress	G10	3	2.7	1.27	15.6	2.71	0.52	56	46.08	58.84	2.51	14.805	16.474	68.88	71.6	50	26	5.29
S2	Stress	G11	3	2.68	1.58	14	2.47	0.64	61	57.18	57.37	2.22	13.856	14.248	59.65	68	56.1	29.26	6.44
S2	Stress	G12	3	2.6	1.65	16.7	2.6	0.38	59	48	56.64	2.19	19.4	19	67.47	80	50	33	6.3
S2	Stress	G13	3	2.55	1.57	11.9	2.91	0.33	59	38	62	2.43	16.2	15.943	71.58	60.7	55.6	28.52	4.67
S2	Stress	G14	3	2.7	1.11	10.9	3.23	0.48	55	34.54	60.45	1.88	10.716	12.002	56	59	34.8	26.84	3.71
